# Supplementary material for: Stepwise Evolution Improves Identification of Diverse Peptides Binding to a Protein Target
Source: PubMed Central journal article supplement (PMC5608804; doi:10.1038/s41598-017-12440-1), 2017-09-21

# **STEPWISE EVOLUTION IMPROVES IDENTIFICATION OF DIVERSE PEPTIDES BINDING TO A PROTEIN TARGET**

**Victor Lyamichev<sup>1</sup>, Lauren Goodrich<sup>1</sup>, Eric Sullivan<sup>1</sup>, Ryan Bannen<sup>1</sup>, Joerg Benz<sup>2</sup>, Thomas Albert<sup>1</sup>, Jigar Patel<sup>1</sup>**

<sup>1</sup>Roche Madison, Madison, WI 53719

<sup>2</sup>Roche Pharmaceutical Research and Early Development, Therapeutic Modalities, Roche Innovation Center  
Basel, Grenzacherstrasse, 4070 Basel, Switzerland

**Supplementary Table 1.** Crystallization of streptavidin and peptides, including data collection and refinement statistics.

| Peptide sequence                                                          | EWWHPQFEQKAK                                                           | GNSFDDWLASKG                                                       | AFPDYLAEYHGG                                                           | RDPAPAWAHGGG                                                       | GyGlanvdessG                                                      | Gdlwqheatwkkq                                                      | GGwhdeatwkpG                                                       | NQpWQ                                                            |
|---------------------------------------------------------------------------|------------------------------------------------------------------------|--------------------------------------------------------------------|------------------------------------------------------------------------|--------------------------------------------------------------------|-------------------------------------------------------------------|--------------------------------------------------------------------|--------------------------------------------------------------------|------------------------------------------------------------------|
| <i>Data collection</i>                                                    |                                                                        |                                                                    |                                                                        |                                                                    |                                                                   |                                                                    |                                                                    |                                                                  |
| <b>Peptide-protein complex formation</b>                                  | Peptide stock: 50mM in water Incubate 3h at RT in 1:2 molar access     | Peptide stock: 10mM in water Incubate 3h at RT in 1:2 molar access | Peptide stock: 50mM in Hepes 7.0 Incubate 3h at RT in 1:3 molar access | Peptide stock: 50mM in water Incubate 3h at RT in 1:2 molar access | Peptide stock: 50mM in DMSO Incubate 4h at RT in 1:3 molar access | Peptide stock: 10mM in water Incubate 3h at RT in 1:3 molar access | Peptide stock: 10mM in water Incubate 3h at RT in 1:3 molar access | Peptide stock: 5mM in water Incubate ON at RT in 1:3 molar ratio |
| <b>Crystallization condition Procomplex (Qiagen)</b>                      | 0.1M Magnesium acetate<br>0.1M Sodium cacodylate pH 6.5<br>15% PEG6000 | 0.1M Potassium chloride<br>0.1M HEPES pH 7.5<br>15% PEG6000        | 0.1M Magnesium chloride<br>0.1M Sodium citrate pH 5<br>15% PEG4000     | 0.2M Ammonium acetate<br>0.1M Sodium acetate pH 4<br>15% PEG4000   | 0.1M Sodium citrate pH 5.6<br>20% PEG4000<br>20% Isopropanol      | 0.1M Sodium citrate pH 4.5<br>20% PEG4000                          | 0.1M Magnesium acetate<br>0.1M MOPS pH 7.5<br>12% PEG8000          | 0.1M Sodium citrate pH 5.5<br>15% PEG6000                        |
| <b>Peptide occupancy</b>                                                  | All 8 sites                                                            | All 8 sites                                                        | All 4 sites                                                            | 3 sites occupied/1 with unidentified mol.                          | 3 of 4                                                            | 1 of 1                                                             | 2 of 2                                                             | All 12 sites                                                     |
| <b>Resolution (Å)</b>                                                     | 80.1-1.12                                                              | 85.5-1.27                                                          | 75.1-1.03                                                              | 57.8-1.10                                                          | 57.09-1.05                                                        | 47.7-1.61                                                          | 62.3-1.10                                                          | 48.72-1.50                                                       |
| <b>Wavelength (Å)</b>                                                     | 0.99992                                                                | 0.70000                                                            | 0.77491                                                                | 0.99992                                                            | 0.70002                                                           | 0.70001                                                            | 0.99999                                                            | 0.99999                                                          |
| <b>Space Group</b>                                                        | P1                                                                     | P1                                                                 | P1 21 1                                                                | P1 21 1                                                            | P1 21 1                                                           | P42 21 2                                                           | C2 2 21                                                            | P21 21 21                                                        |
| <b>Cell dimensions a,b,c (Å)<br/><math>\alpha,\beta,\gamma</math> (°)</b> | 57.1, 64.8, 96.3<br>96.3, 97.1, 84.1                                   | 58.3, 58.3, 88.3<br>104.4, 91.0, 88.4                              | 51.3, 65.8, 78.1<br>90, 103.7, 90                                      | 46.8, 84.7, 58.5<br>90, 99.4, 90                                   | 46.7, 84.9, 57.8<br>90, 99.1, 90                                  | 57.8, 57.8, 84.4<br>90, 90, 90                                     | 81.9, 95.7, 82.1<br>90, 90, 90                                     | 67.7, 115.3, 210.4<br>90, 90, 90                                 |
| <b>No. Molecules in AU</b>                                                | 8                                                                      | 8                                                                  | 4                                                                      | 4                                                                  | 4                                                                 | 1                                                                  | 2                                                                  | 12                                                               |
| <b>Total reflections</b>                                                  | 642986                                                                 | 473781                                                             | 458324                                                                 | 331071                                                             | 396326                                                            | 35419                                                              | 249576                                                             | 693361                                                           |
| <b>Unique reflections</b>                                                 | 403025                                                                 | 273857                                                             | 235380                                                                 | 167056                                                             | 195681                                                            | 18228                                                              | 122566                                                             | 261661                                                           |
| <b>Multiplicity (I)</b>                                                   | 1.66 (1.53)                                                            | 1.74 (1.70)                                                        | 3.38 (3.33)                                                            | 3.17 (2.75)                                                        | 3.43 (3.40)                                                       | 12.48 (12.93)                                                      | 6.20 (5.29)                                                        | 6.58(5.77)                                                       |
| <b>Completeness (%)</b>                                                   | 90.4 (86.1)                                                            | 97.0 (95.7)                                                        | 99.5 (99.7)                                                            | 96.7 (85.3)                                                        | 99.6 (99.7)                                                       | 100 (100)                                                          | 99.2 (96.8)                                                        | 99.7 (98.4)                                                      |
| <b>Mean I/<math>\sigma</math>(I)</b>                                      | 10.03 (0.94)                                                           | 7.71 (0.90)                                                        | 9.44 (1.14)                                                            | 15.2 (4.26)                                                        | 11.4 (1.11)                                                       | 14.94 (0.86)                                                       | 17.4 (4.01)                                                        | 13.3 (1.49)                                                      |
| <b>Rsym</b>                                                               | 0.031 (0.54)                                                           | 0.072 (0.67)                                                       | 0.045 (0.65)                                                           | 0.031 (0.28)                                                       | 0.036 (0.79)                                                      | 0.057 (0.95)                                                       | 0.048 (0.40)                                                       | 0.079 (0.677)                                                    |
| <b>CC1/2</b>                                                              | 99.9 (36.4)                                                            | 99.8 (37.8)                                                        | 99.9 (36.7)                                                            | 99.9 (88.8)                                                        | 100 (38.8)                                                        | 100 (34.1)                                                         | 100 (79.2)                                                         | 99.9 (44.7)                                                      |
| <i>Refinement</i>                                                         |                                                                        |                                                                    |                                                                        |                                                                    |                                                                   |                                                                    |                                                                    |                                                                  |
| <b>Rcryst</b>                                                             | 16.1 (34.2)                                                            | 18.4 (43.0)                                                        | 14.1 (32.8)                                                            | 13.5 (18.4)                                                        | 17.3 (33.5)                                                       | 20.2 (42.2)                                                        | 13.9 (32.3)                                                        |                                                                  |
| <b>Rfree</b>                                                              | 18.6 (36.6)                                                            | 20.7 (44.3)                                                        | 15.7 (32.6)                                                            | 15.2 (20.1)                                                        | 19.8 (34.5)                                                       | 24.1 (38.9)                                                        | 15.4 (32.3)                                                        | 19.1 (27.8)                                                      |
| <b>R.m.s. deviations<br/>Bond lengths (Å)<br/>Bond angles (°)</b>         | 0.013<br>1.55                                                          | 0.012<br>1.42                                                      | 0.007<br>1.37                                                          | 0.008<br>1.35                                                      | 0.010<br>1.47                                                     | 0.010<br>1.56                                                      | 0.007<br>1.41                                                      | 0.010<br>1.10                                                    |
| <b>Ramachandran (%)<br/>Favored,<br/>allowed,<br/>outliers</b>            | 97.8, 2.2, 0                                                           | 97.4, 2.6, 0                                                       | 96.3, 3.7, 0                                                           | 97.7, 2.1, 0.2                                                     | 96.2, 2.3, 1.4                                                    | 95.1, 4.1, 0.8                                                     | 92.9, 5, 2.1                                                       | 96.6, 2.6, 0.8                                                   |
| <b>No. atoms<br/>Protein<br/>Peptide<br/>Water</b>                        | 9634<br>7572<br>792<br>1270                                            | 9317<br>7415<br>732<br>1108                                        | 5153<br>3799<br>384<br>964                                             | 4771<br>3854<br>243<br>637                                         | 4571<br>3707<br>167<br>689                                        | 1059<br>907<br>85<br>67                                            | 2502<br>1899<br>180<br>413                                         | 13995<br>11367<br>476<br>2098                                    |
| <b>B-factors<br/>Protein<br/>Peptide<br/>Water</b>                        | 14.21<br>20.83<br>29.21                                                | 15.46<br>19.41<br>27.14                                            | 9.91<br>9.17<br>27.45                                                  | 10.18<br>12.14<br>22.71                                            | 8.81<br>11.08<br>22.95                                            | 28.89<br>34.56<br>35.17                                            | 7.14<br>8.81<br>22.27                                              | 21.60<br>22.96<br>35.83                                          |
| <b>PDB code</b>                                                           | 5N7X                                                                   | 5N89                                                               | 5N8B                                                                   | 5N8E                                                               | 5N8S                                                              | 5N8T                                                               | 5N8W                                                               | 5N99                                                             |

**Supplementary Table 4A.** Polar interactions of biotin with streptavidin (1SWE).

|        |                                                          |
|--------|----------------------------------------------------------|
| Biotin | Streptavidin amino acids (single-letter amino acid code) |
|        | N23, S27, Y43, S45, N49, S88, D128, W120 (trp120)        |

**Supplementary Table 4B.** Interactions at 4.0 Å distance between peptide binders used for crystallography study (Fig. 1) and streptavidin:

## EWWHPQFEQKA peptide (5N7X)

| Peptide | streptavidin                   |
|---------|--------------------------------|
| E1      | N118 (trp120), K121 (trp120)   |
| W2      | W120 (trp120)                  |
| V3      | W120 (trp120)                  |
| H4      | W79, S88, L110, W120 (trp120)  |
| P5      | S45, Y54, R84, A86             |
| Q6      | S27, W79, T90, W92, W108, L110 |
| F7      | L25, W108, L110, W120 (trp120) |
| E8      | S45, A46, V47, S52, R84        |
| Q9      | L25, A46, V47                  |
| K10     | A46, V47                       |
| A11     | none                           |

## GNSFDDWLASKGG peptide (5N89)

| Peptide               | streptavidin                                          |
|-----------------------|-------------------------------------------------------|
| G1                    | none                                                  |
| N2                    | L25, S45, A46                                         |
| S3                    | A117 (trp120), N118 (trp120 loop), W120 (trp120 loop) |
| F4                    | W79, L110, L124, W120 (trp120 loop)                   |
| D5                    | S45, A46, S52, R84                                    |
| D6                    | none                                                  |
| W7                    | S88, W120 (trp120 loop)                               |
| L8                    | S45, Y54, W79, R84, A86                               |
| A9                    | R84                                                   |
| S10                   | none                                                  |
| K11                   | A86                                                   |
| G12                   | R84, N85                                              |
| Glycerol/streptavidin | N23, L25, Y43, W79, T90, W92, L110, W108, L110, D128  |
| Glycerol/peptide      | F4                                                    |

## AFPDYLAEYHGG peptide (5N8B)

| Peptide | streptavidin                           |
|---------|----------------------------------------|
| A1      | A86, H87, S88, S112                    |
| F2      | L110, S112, S122, L124                 |
| P3      | A86, W120 (trp120 loop)                |
| D4      | N118 (trp120 loop), K121 (trp120 loop) |
| Y5      | Y54, R84, A86                          |
| L6      | W79, S88, W120 (trp120 loop)           |
| A7      | W120 (trp120 loop)                     |
| E8      | N23, L25, S27, S45, A46                |

|     |                                                      |
|-----|------------------------------------------------------|
| Y9  | S27, Y43, E44, S45, S52, Y54, W79, R84               |
| H10 | W79, T90, W108, L110, H127, D128, W120 (trp120 loop) |
| G11 | N23, L25, D128                                       |
| G12 | L25, A117 (trp120 loop), W120 (trp120 loop)          |

RDPAPAWAHGGG peptide (5N8E)

|         |                                             |
|---------|---------------------------------------------|
| Peptide | streptavidin                                |
| R1      | K121 (Trp120 loop)                          |
| D2      | W120 (trp120 loop), K121 (trp120 loop)      |
| P3      | A86, S88, S112, L124, W120 (trp120 loop)    |
| A4      | W79, S88, L110, W120 (trp120 loop)          |
| P5      | W79                                         |
| A6      | W120 (trp120 loop)                          |
| W7      | N23, L25, S27, Y43, E44, S45, S52           |
| A8      | Y43, W79, W92                               |
| H9      | W79, T90, W108, L110, W120 (trp120 loop)    |
| G10     | N23, L25, D128                              |
| G11     | L25, A117 (trp120 loop), W120 (trp120 loop) |
| G12     | A117 (trp120 loop), W120 (trp120 loop)      |

Gdlwqheatwkkq peptide (5N8T)

|         |                                    |
|---------|------------------------------------|
| Peptide | streptavidin                       |
| l3      | L25, S27, Y43                      |
| w4      | N23, S27, Y43, W79, T90, W92, W108 |
| q5      | W108                               |
| h6      | none                               |
| e7      | Y43, S52, Y54, W79, A86            |
| a8      | W79, A86, S88, L110                |
| t9      | A86                                |
| w10     | R84, N85, A86                      |
| k11     | none                               |

GGwhdeatwkpG peptide (5N8W)

|         |                                     |
|---------|-------------------------------------|
| Peptide | streptavidin                        |
| G1      | L25                                 |
| G2      | L25, G26, S27, Y43                  |
| w3      | S27, Y43, W79, T90, W92, W108, D128 |
| h4      | none                                |
| d5      | none                                |
| e6      | Y43, S52, Y54, W79, R84             |
| a7      | W79, A86, S88, L110                 |

Supplementary Figure 1. Principal component analysis (PCA) for 81 'non-HPQ' sequences selected from L-amino acid 5-mer library (Supplementary Table 2B). Sequences selected for the extension step are highlighted in green color.

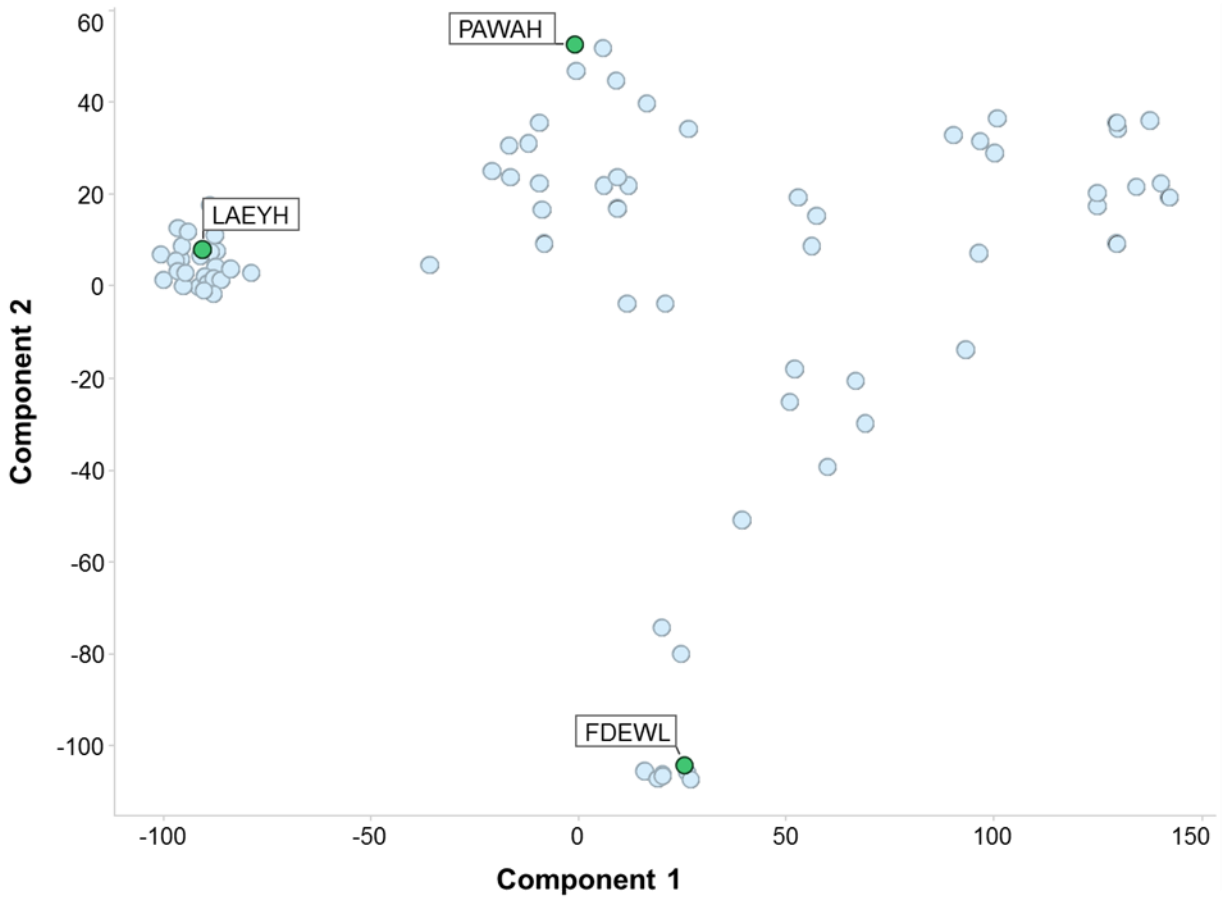

**Supplementary Figure 2.** Logo plots created for 15 sequences with the highest streptavidin binding signal selected from ‘HPQ’, ‘FDEWL’, ‘LAEYH’, ‘PAWAH’ L-amino acid and ‘lanvd’, ‘wqeea’ D-amino acid extension libraries.

‘HPQ’ extension library.

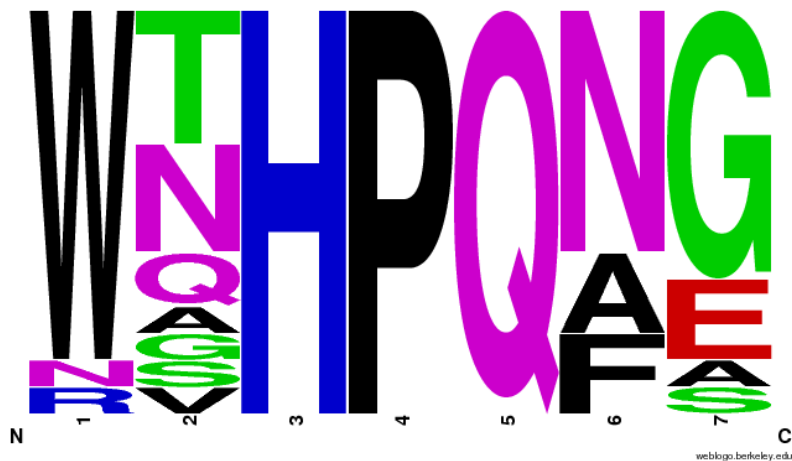

‘FDEWL’ extension library

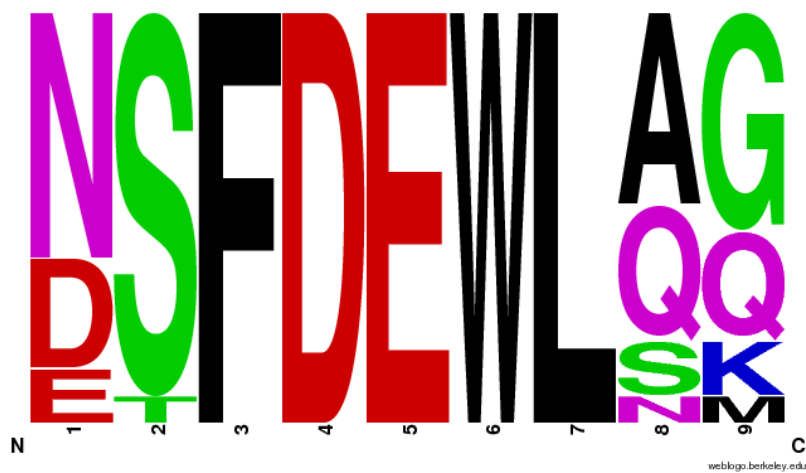

‘LAEYH’ extension library

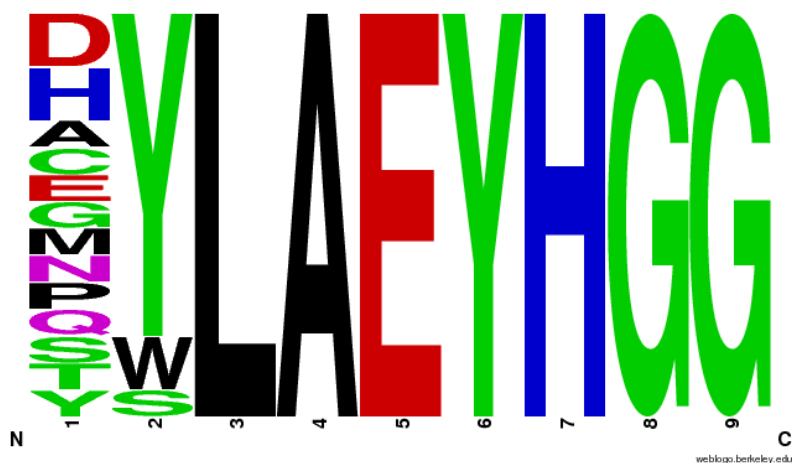

'PAWAH' extension library

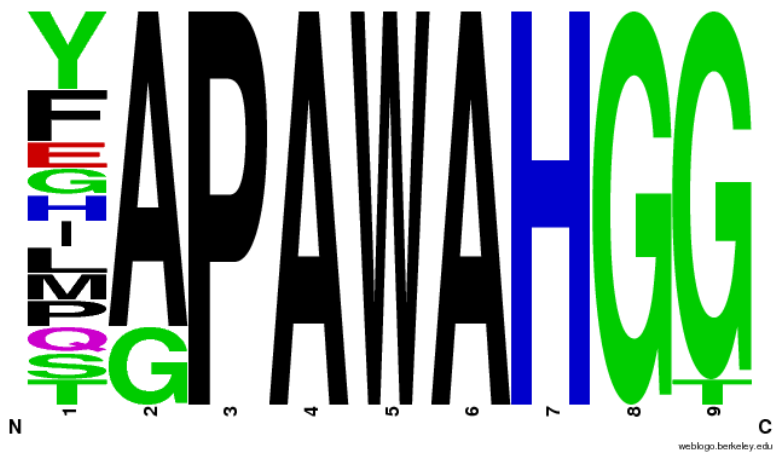

'lanvd' extension library

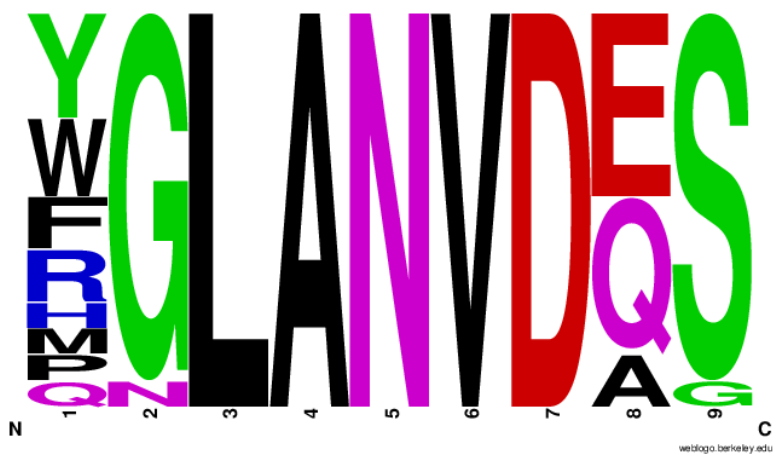

'wqeea' extension library

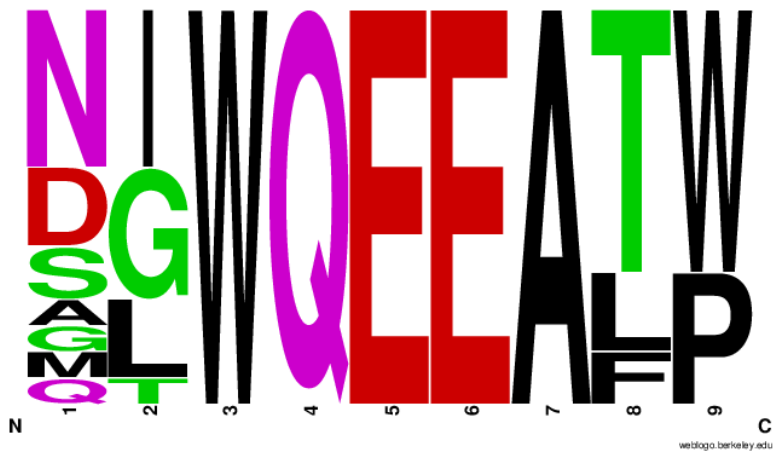

**Supplementary Figure 3.** Cyclic versus linear fluorescence signal intensity for the peptide library XXXXU bound to streptavidin-Cy5.

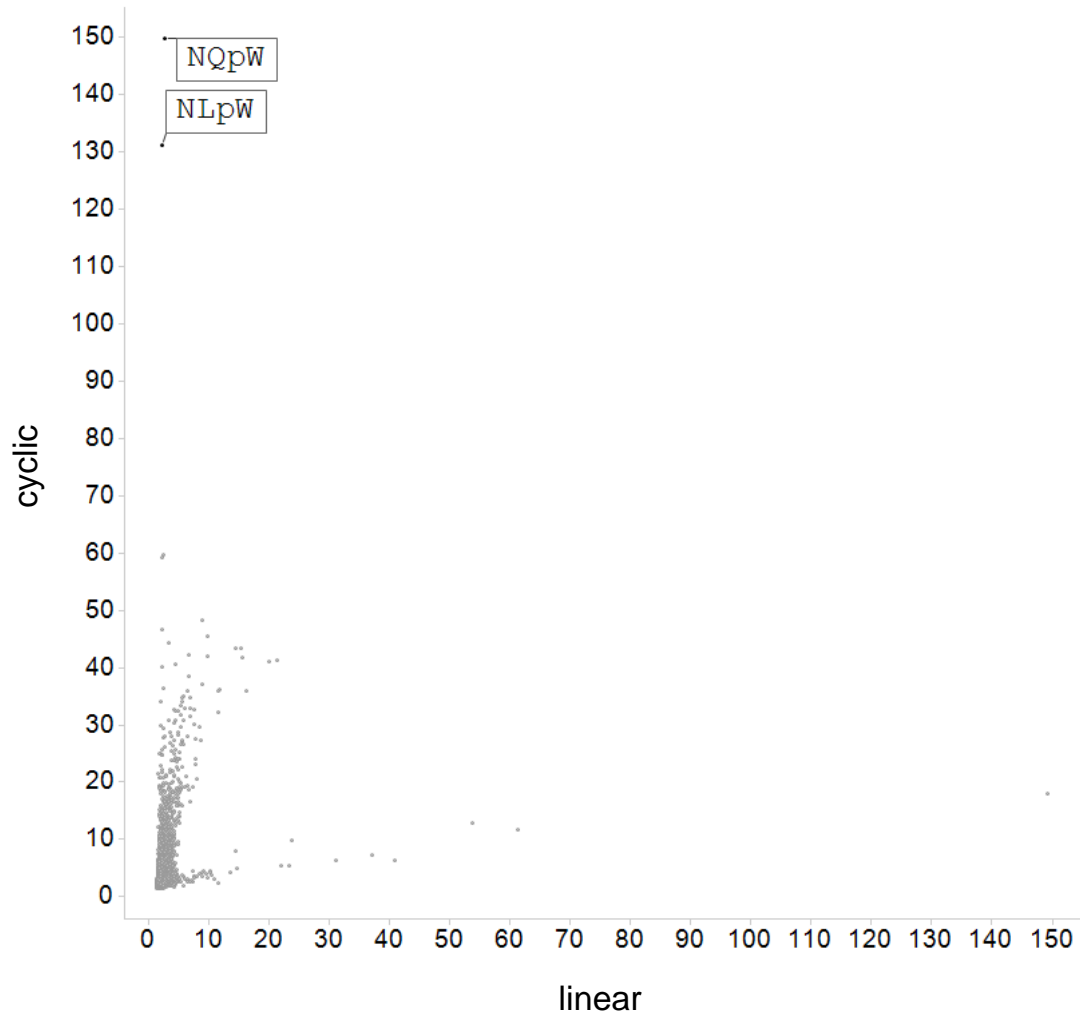



**Supplementary Figure 4.** SPR sensorgrams for interaction between surface immobilized streptavidin and L-, D- and cyclic L/D- peptides listed in Table 1. **A.** NH<sub>2</sub>-SAWSHPQFEK-COOH L-peptide (Strep-tag II HPQ); **B.** NH<sub>2</sub>-EWSHPQFEKAK-amide L-peptide; **C.** NH<sub>2</sub>-GNSFDDWLASKG-amide L-peptide; **D.** NH<sub>2</sub>-AFPDYLAEYHGG-amide L-peptide; **E.** NH<sub>2</sub>-RDPAPAWAHGGG-amide L-peptide; **F.** NH<sub>2</sub>-GyGlanvdessG-amide D-peptide; **G.** NH<sub>2</sub>-Gdlwqheatwkkq-amide D-peptide; **H.** NH<sub>2</sub>-GGwhdeatwkpG-amide D-peptide; **I.** NQpWQ cyclic peptide. For peptides with ‘fast on, fast off’ kinetics (**A-B, I**), steady state affinity binding vs. concentration curves are shown and calculated equilibrium dissociation constant ( $K_d$ ) indicated. GNSFDDWLASKG peptide (**C**) showed irreversible binding so binding parameters could not be determined. For other peptides (**D-H**), association rate constant ( $k_a$ ), dissociation rate constant ( $k_d$ ) and  $K_d$  were calculated using 1:1 binding model.

**A.** NH<sub>2</sub>-SAWSHPQFEK-COOH (Strep-tag II HPQ)

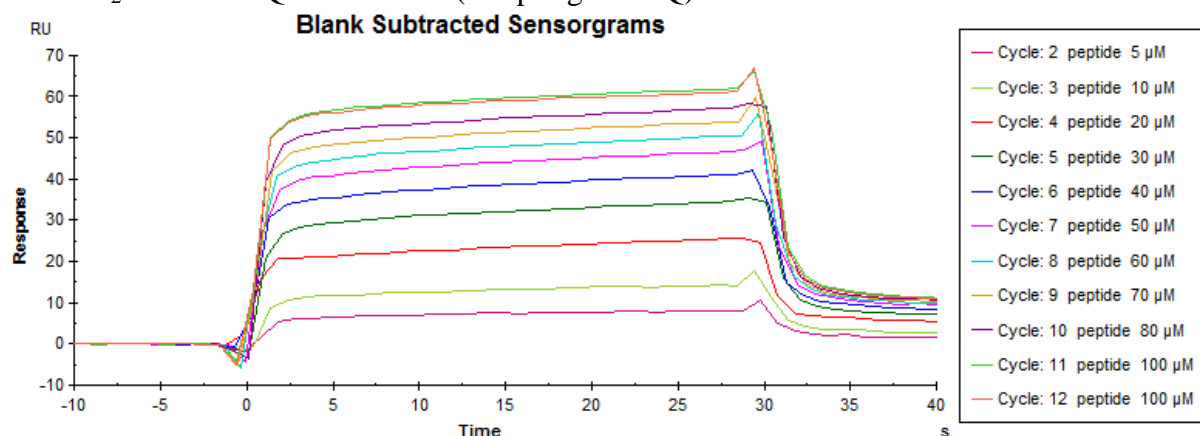

**Steady state affinity curve,  $K_d$  49.8  $\mu$ M**

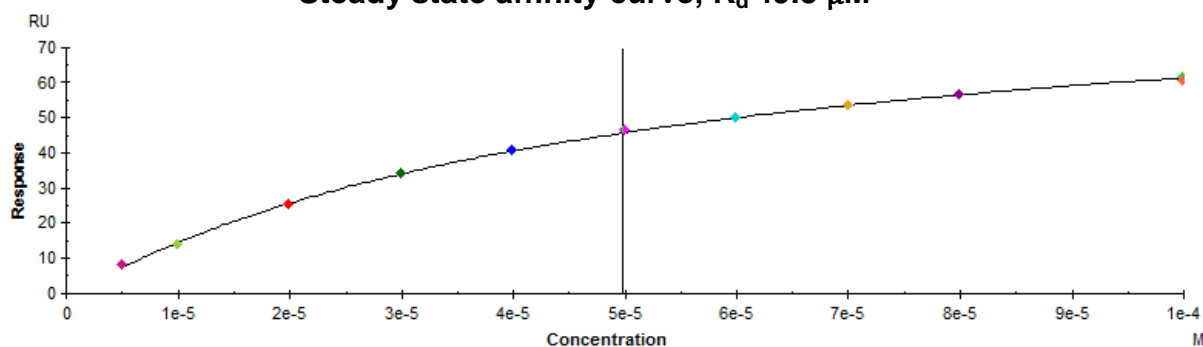

# B, NH<sub>2</sub>-EWVHPQFEQKAK-amide

## Blank Subtracted Sensorgrams

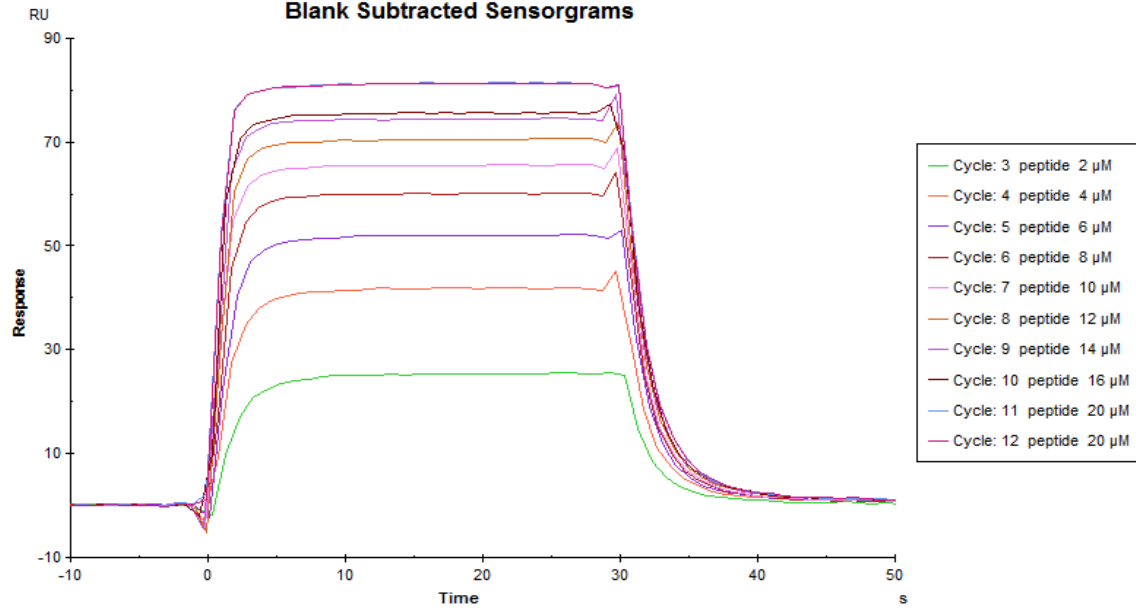

## Steady state affinity curve, $K_d$ 5.7 $\mu\text{M}$

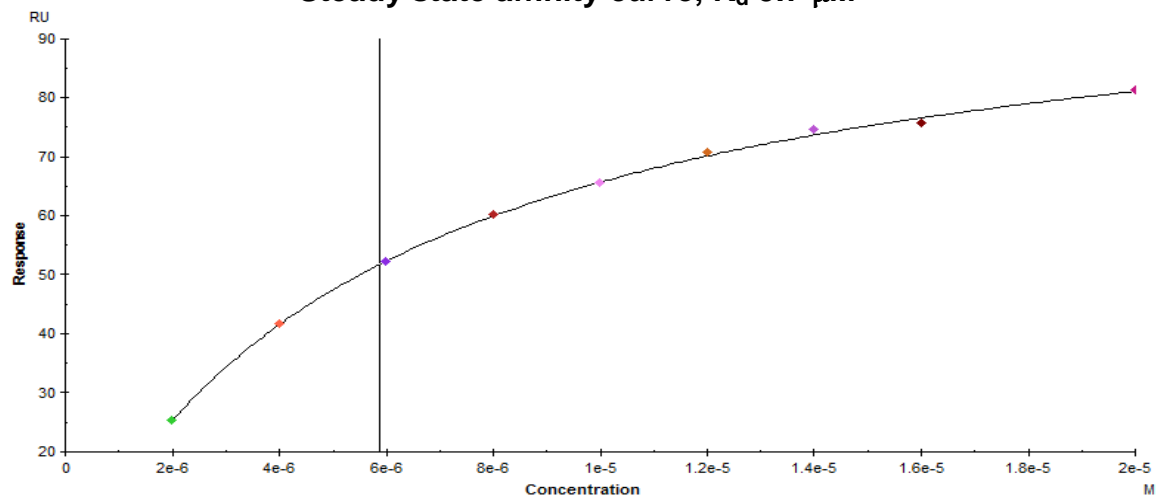

# C, NH<sub>2</sub>-GNSFDDWLASKG-amide

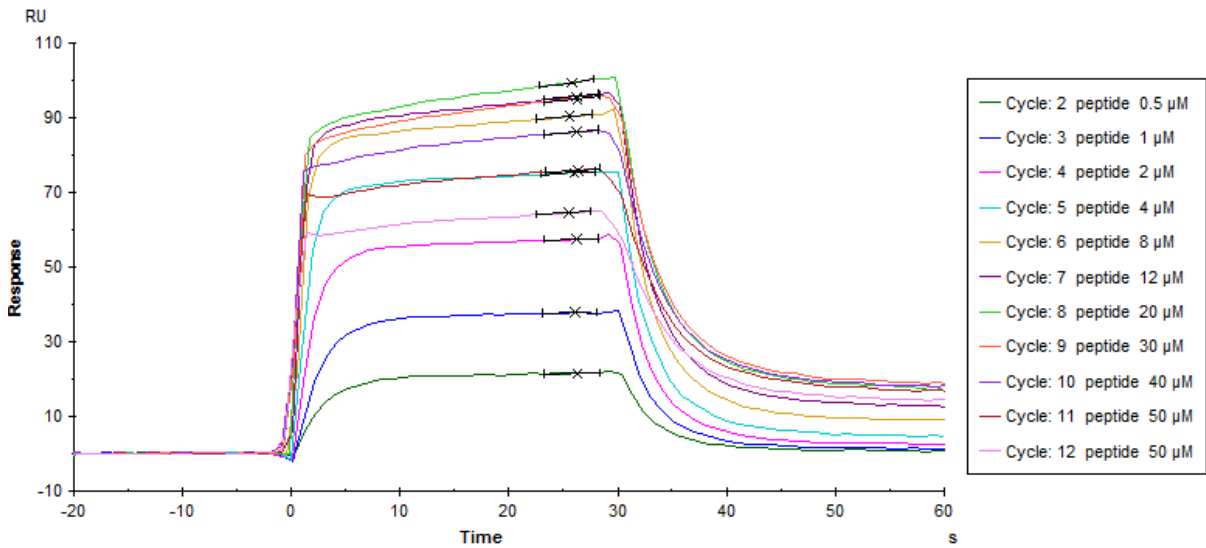

Steady state affinity curve

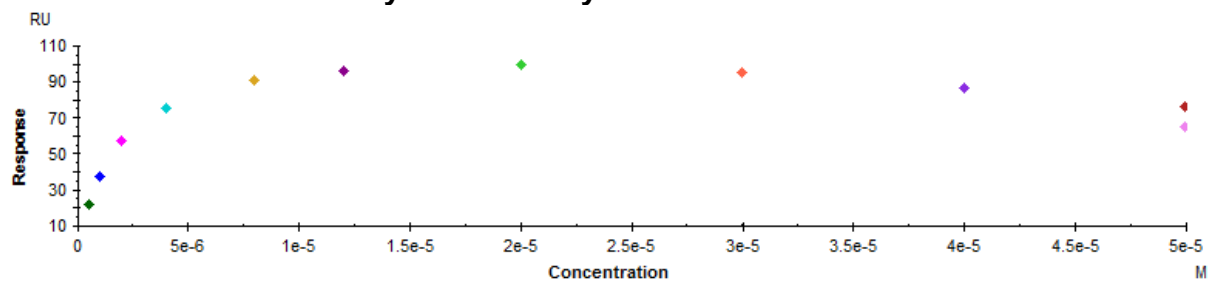

# D, NH<sub>2</sub>-AFPDYLAEYHGG-amide

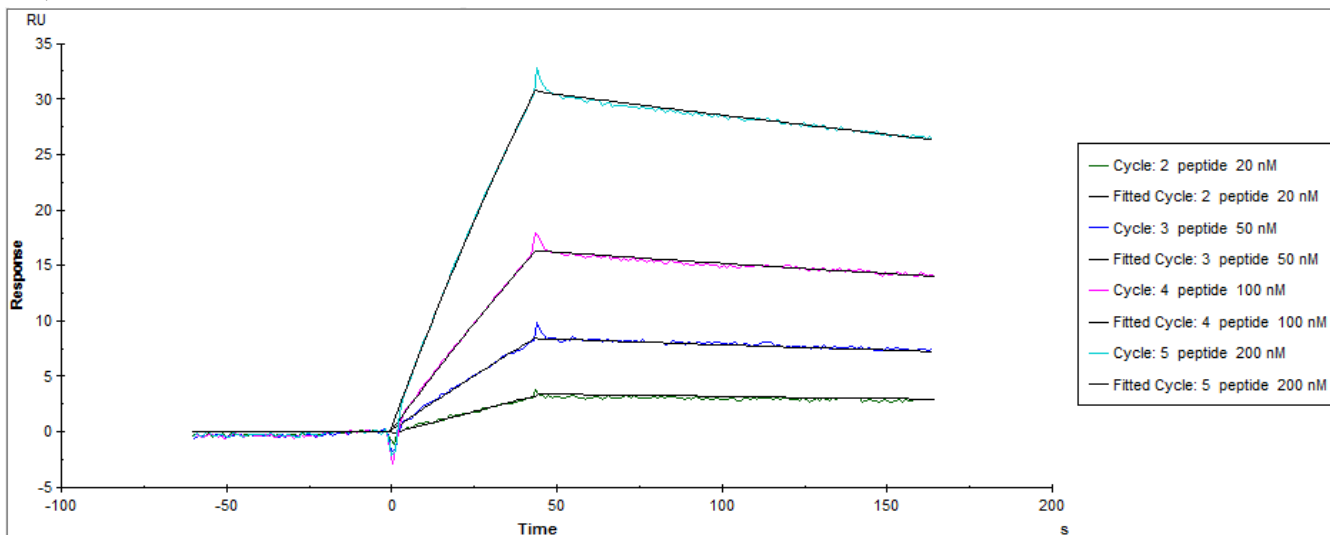

| Curve           | ka (1/Ms) | kd (1/s) | KD (M)   | Rmax (RU) | Conc (M) | tc       | Flow (ul/min) | kt (RU/Ms) | RI (RU) | Chi <sup>2</sup> (RU <sup>2</sup> ) | U-value |
|-----------------|-----------|----------|----------|-----------|----------|----------|---------------|------------|---------|-------------------------------------|---------|
| Cycle: 2 20 nM  | 3.007E+4  | 0.001278 | 4.248E-8 | 136.7     | 2.000E-8 | 1.073E+8 | 30.00         | 3.335E+8   | -0.1694 | 0.101                               | 2       |
| Cycle: 3 50 nM  |           |          |          |           | 5.000E-8 |          | 30.00         | 3.335E+8   | 0.1336  |                                     |         |
| Cycle: 4 100 nM |           |          |          |           | 1.000E-7 |          | 30.00         | 3.335E+8   | 0.1456  |                                     |         |
| Cycle: 5 200 nM |           |          |          |           | 2.000E-7 |          | 30.00         | 3.335E+8   | 0.4177  |                                     |         |

# E, NH<sub>2</sub>-RDPAPAWAHGGG-amide

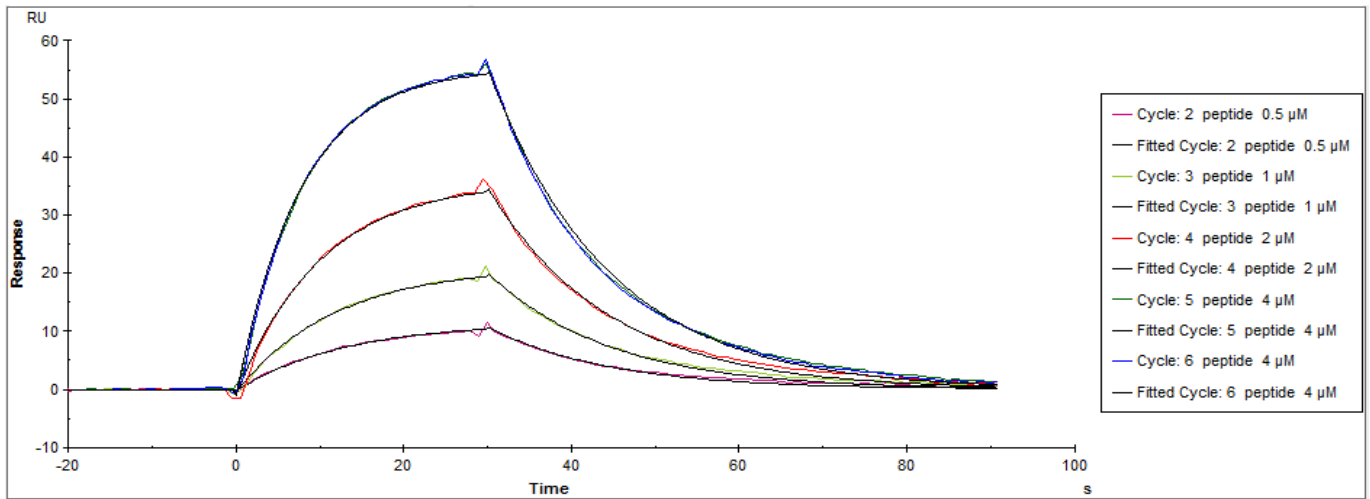

| Curve           | ka (1/Ms) | kd (1/s) | KD (M)   | Rmax (RU) | Conc (M) | tc        | Flow (ul/min) | kt (RU/Ms) | RI (RU) | Chi <sup>2</sup> (RU <sup>2</sup> ) | U-value |
|-----------------|-----------|----------|----------|-----------|----------|-----------|---------------|------------|---------|-------------------------------------|---------|
| Cycle: 2 0.5 μM | 1.492E+4  | 0.06956  | 4.661E-6 | 122.3     | 5.000E-7 | 3.024E+10 | 30.00         | 9.395E+10  | -0.2638 | 0.228                               | 1       |
| Cycle: 3 1 μM   |           |          |          |           | 1.000E-6 |           | 30.00         | 9.395E+10  | -0.4141 |                                     |         |
| Cycle: 4 2 μM   |           |          |          |           | 2.000E-6 |           | 30.00         | 9.395E+10  | -0.8456 |                                     |         |
| Cycle: 5 4 μM   |           |          |          |           | 4.000E-6 |           | 30.00         | 9.395E+10  | -1.045  |                                     |         |
| Cycle: 6 4 μM   |           |          |          |           | 4.000E-6 |           | 30.00         | 9.395E+10  | -1.025  |                                     |         |

# F, NH<sub>2</sub>-GyGlanvdessG-amide D-peptide

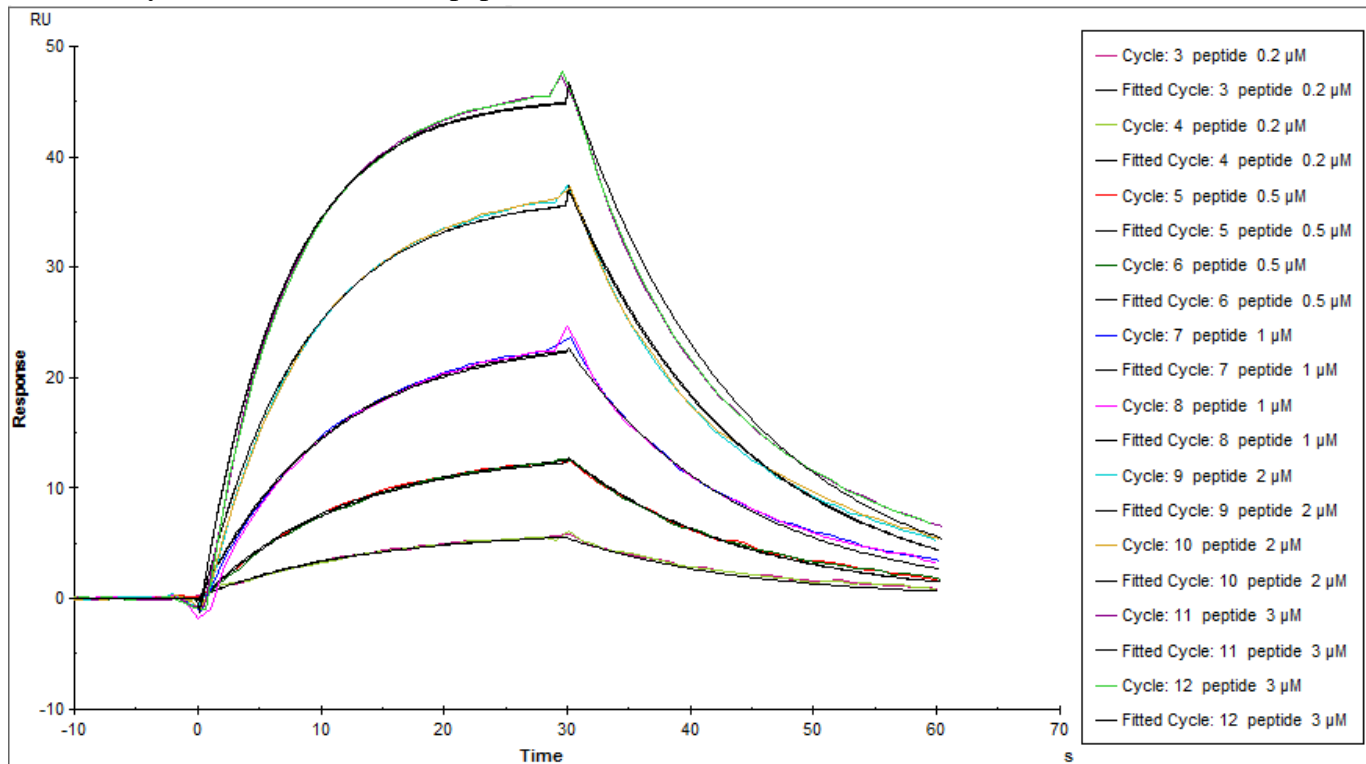

| Curve           | ka (1/Ms) | kd (1/s) | KD (M)   | Rmax (RU) | Conc (M) | tc       | Flow (ul/min) | kt (RU/Ms) | RI (RU) | Chi <sup>2</sup> (RU <sup>2</sup> ) | U-value |
|-----------------|-----------|----------|----------|-----------|----------|----------|---------------|------------|---------|-------------------------------------|---------|
|                 | 2.482E+4  | 0.07125  | 2.870E-6 | 93.39     |          | 1.643E+9 |               |            |         | 0.206                               | 1       |
| Cycle: 3 0.2 μM |           |          |          |           | 2.000E-7 |          | 30.00         | 5.104E+9   | 0.1173  |                                     |         |
| Cycle: 4 0.2 μM |           |          |          |           | 2.000E-7 |          | 30.00         | 5.104E+9   | 0.06025 |                                     |         |
| Cycle: 5 0.5 μM |           |          |          |           | 5.000E-7 |          | 30.00         | 5.104E+9   | -0.2611 |                                     |         |
| Cycle: 6 0.5 μM |           |          |          |           | 5.000E-7 |          | 30.00         | 5.104E+9   | -0.4367 |                                     |         |
| Cycle: 7 1 μM   |           |          |          |           | 1.000E-6 |          | 30.00         | 5.104E+9   | -0.3845 |                                     |         |
| Cycle: 8 1 μM   |           |          |          |           | 1.000E-6 |          | 30.00         | 5.104E+9   | -0.5493 |                                     |         |
| Cycle: 9 2 μM   |           |          |          |           | 2.000E-6 |          | 30.00         | 5.104E+9   | -1.797  |                                     |         |
| Cycle: 10 2 μM  |           |          |          |           | 2.000E-6 |          | 30.00         | 5.104E+9   | -1.821  |                                     |         |
| Cycle: 11 3 μM  |           |          |          |           | 3.000E-6 |          | 30.00         | 5.104E+9   | -2.241  |                                     |         |
| Cycle: 12 3 μM  |           |          |          |           | 3.000E-6 |          | 30.00         | 5.104E+9   | -2.362  |                                     |         |

# G, NH<sub>2</sub>-Gdlwqheatwkkq-amide D-peptide

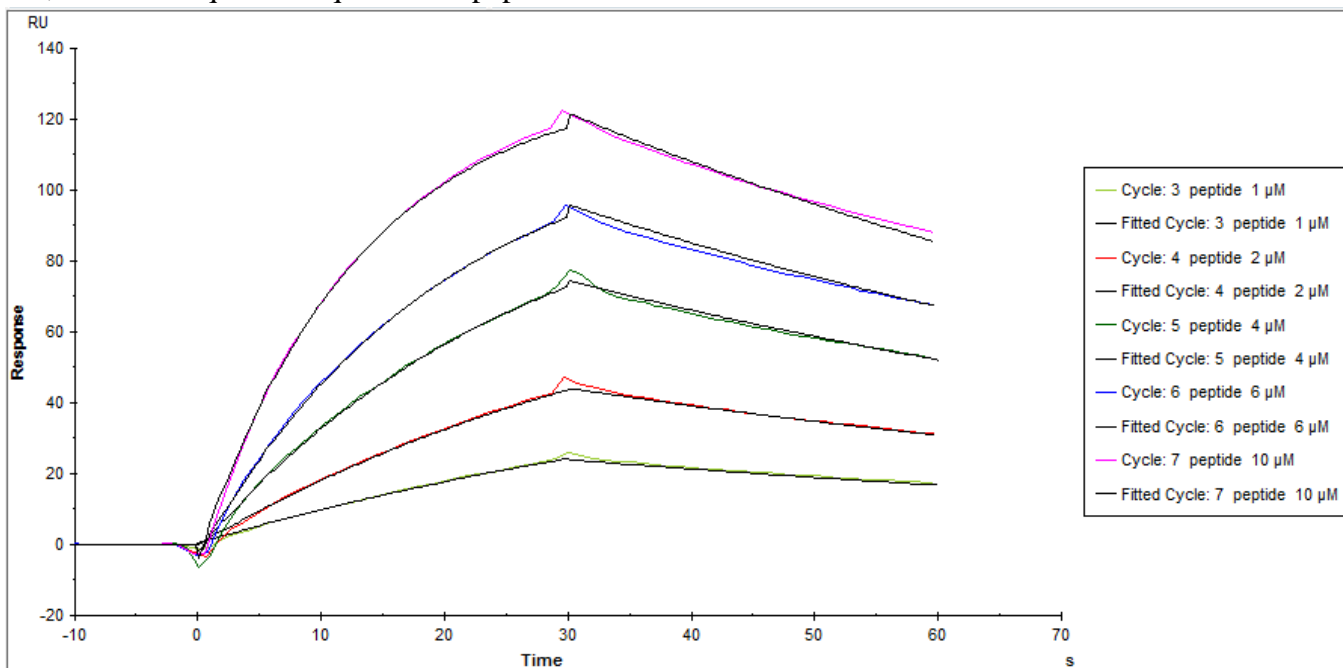

| Curve          | ka (1/Ms) | kd (1/s) | KD (M)   | Rmax (RU) | Conc (M) | tc        | Flow (ul/min) | kt (RU/Ms) | RI (RU) | Chi <sup>2</sup> (RU <sup>2</sup> ) | U-value |
|----------------|-----------|----------|----------|-----------|----------|-----------|---------------|------------|---------|-------------------------------------|---------|
|                | 6485      | 0.01191  | 1.837E-6 | 159.9     |          | 4.501E+18 |               |            |         | 0.710                               | 1       |
| Cycle: 3 1 μM  |           |          |          |           | 1.000E-6 |           | 30.00         | 1.398E+19  | 0.2926  |                                     |         |
| Cycle: 4 2 μM  |           |          |          |           | 2.000E-6 |           | 30.00         | 1.398E+19  | -0.2846 |                                     |         |
| Cycle: 5 4 μM  |           |          |          |           | 4.000E-6 |           | 30.00         | 1.398E+19  | -1.747  |                                     |         |
| Cycle: 6 6 μM  |           |          |          |           | 6.000E-6 |           | 30.00         | 1.398E+19  | -3.465  |                                     |         |
| Cycle: 7 10 μM |           |          |          |           | 1.000E-5 |           | 30.00         | 1.398E+19  | -4.078  |                                     |         |

# H, NH<sub>2</sub>-GGwhdeatwkpG-amide

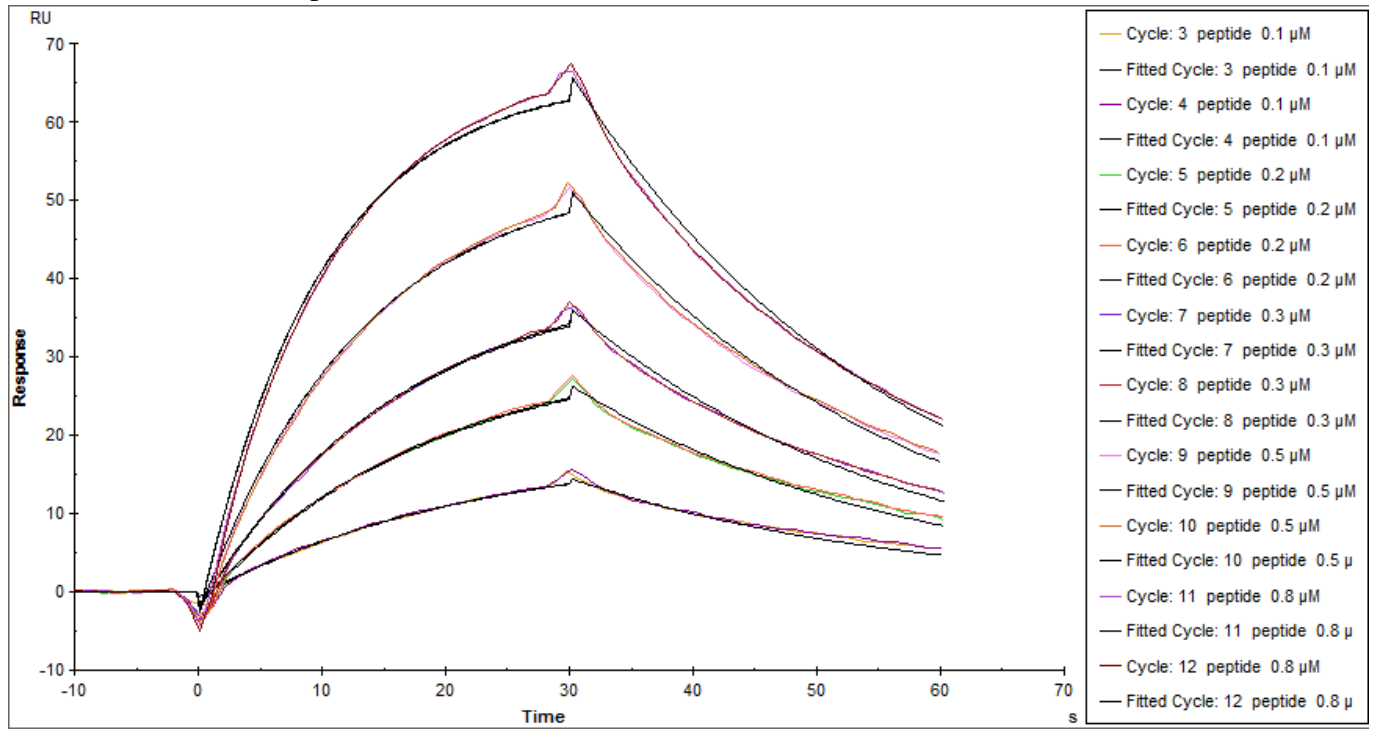

| Curve            | ka (1/Ms) | kd (1/s) | KD (M)   | Rmax (RU) | Conc (M) | tc        | Flow (ul/min) | kt (RU/Ms) | RI (RU) | Chi <sup>2</sup> (RU <sup>2</sup> ) | U-value |
|------------------|-----------|----------|----------|-----------|----------|-----------|---------------|------------|---------|-------------------------------------|---------|
|                  | 8.071E+4  | 0.03797  | 4.704E-7 | 110.5     |          | 4.110E+10 |               |            |         | 0.441                               | 1       |
| Cycle: 3 0.1 μM  |           |          |          |           | 1.000E-7 |           | 30.00         | 1.277E+11  | -0.7818 |                                     |         |
| Cycle: 4 0.1 μM  |           |          |          |           | 1.000E-7 |           | 30.00         | 1.277E+11  | -0.7464 |                                     |         |
| Cycle: 5 0.2 μM  |           |          |          |           | 2.000E-7 |           | 30.00         | 1.277E+11  | -1.906  |                                     |         |
| Cycle: 6 0.2 μM  |           |          |          |           | 2.000E-7 |           | 30.00         | 1.277E+11  | -1.700  |                                     |         |
| Cycle: 7 0.3 μM  |           |          |          |           | 3.000E-7 |           | 30.00         | 1.277E+11  | -2.452  |                                     |         |
| Cycle: 8 0.3 μM  |           |          |          |           | 3.000E-7 |           | 30.00         | 1.277E+11  | -2.216  |                                     |         |
| Cycle: 9 0.5 μM  |           |          |          |           | 5.000E-7 |           | 30.00         | 1.277E+11  | -3.089  |                                     |         |
| Cycle: 10 0.5 μM |           |          |          |           | 5.000E-7 |           | 30.00         | 1.277E+11  | -3.130  |                                     |         |
| Cycle: 11 0.8 μM |           |          |          |           | 8.000E-7 |           | 30.00         | 1.277E+11  | -3.624  |                                     |         |
| Cycle: 12 0.8 μM |           |          |          |           | 8.000E-7 |           | 30.00         | 1.277E+11  | -3.519  |                                     |         |



# I, NQpWQ cyclic peptide

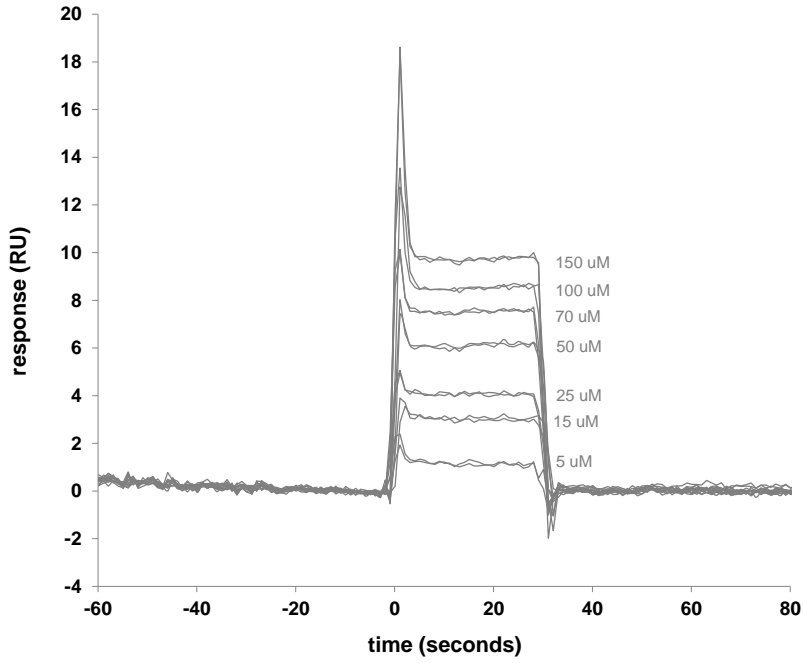

Steady state affinity curve,  $K_d$  61.3  $\mu$ M

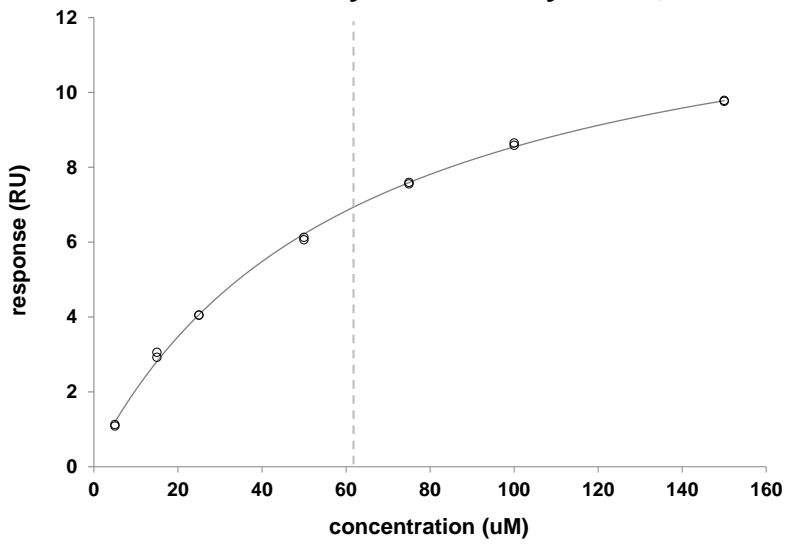

Supplementary Figure 5. Specificity plot and co-crystal structure with streptavidin for AFPDYLAQYHGG L-peptide. (A) Double substitution plot for AFPDYLAQYHGG peptide with Glu amino acid fixed at position Q8 showing signal intensity for 20 amino acid substitutions for each peptide position. The color coding scheme for the bars representing signal intensity is the same as in Figure 2. (B) Co-crystal structure with streptavidin for AFPDYLAQYHGG peptide. The dashed lined show interactions between peptide (green) and streptavidin (grey) key amino acids at 4Å distance. Biotin-binding pocket of streptavidin shown as surface.

The AFPDYLAQYHGG peptide exhibits the highest affinity for streptavidin in SPR measurements (Table 1) and shows tight interaction network with streptavidin. The backbone nitrogen and carbonyl of Ala1 form hydrogen bonds with Ser112 and Ser88, respectively. Phe2 is involved in hydrophobic interactions with Leu110 and Leu124. Structural- and substitution-critical amino acids (Fig. 2) include: (1) Tyr5, which stacks against the sidechain of Arg84; (2) Tyr9, which forms a hydrogen bond with Ser52 in loop3/4; (3) His10, which forms a hydrogen bond with Thr90; and (4) Gly11, which interacts with Leu25 and Asp128.

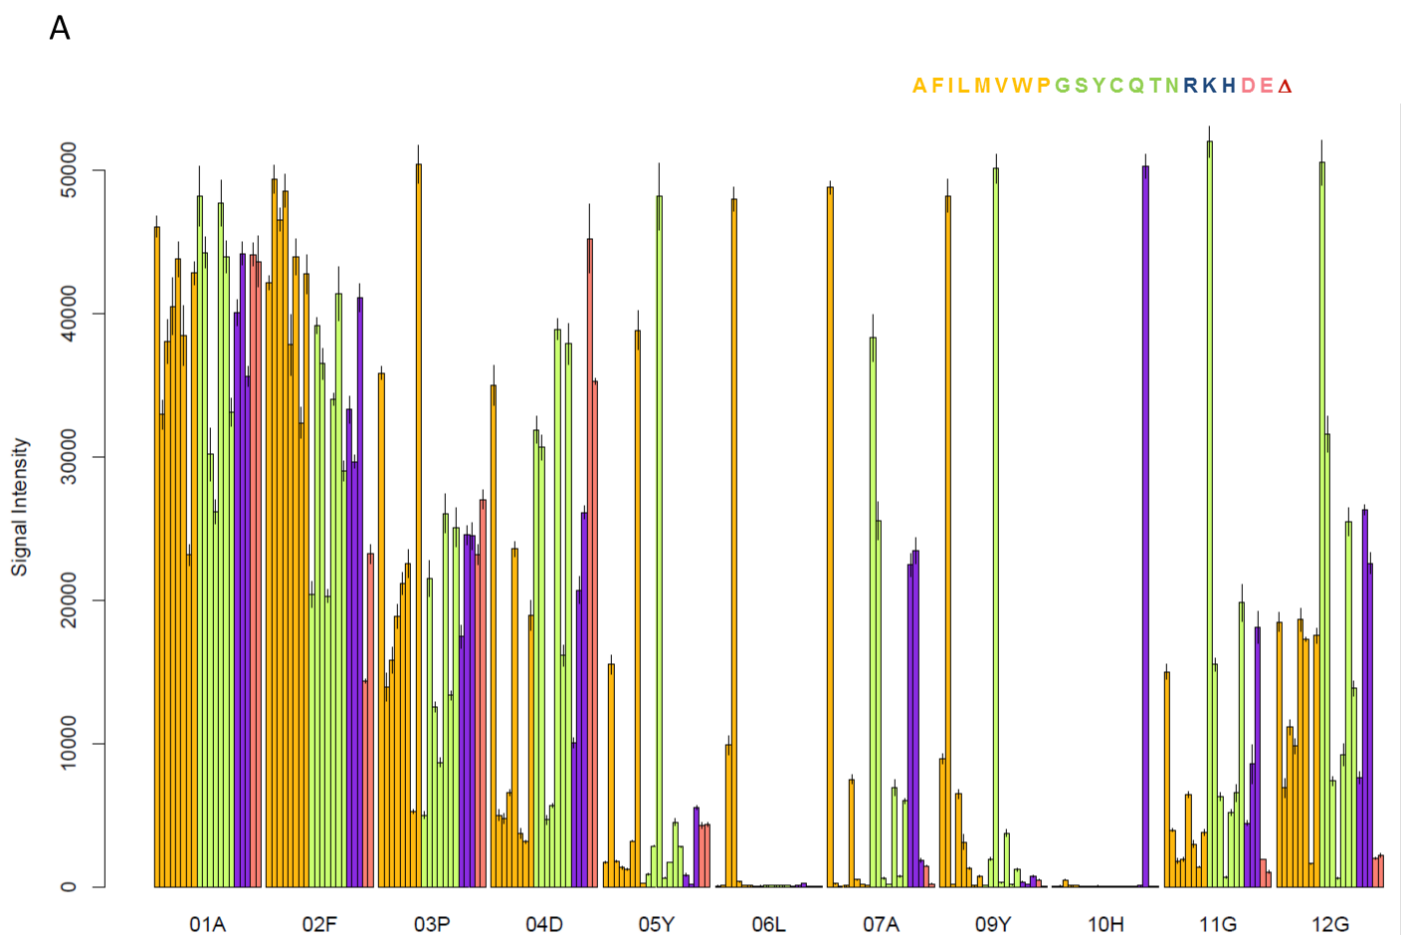

B

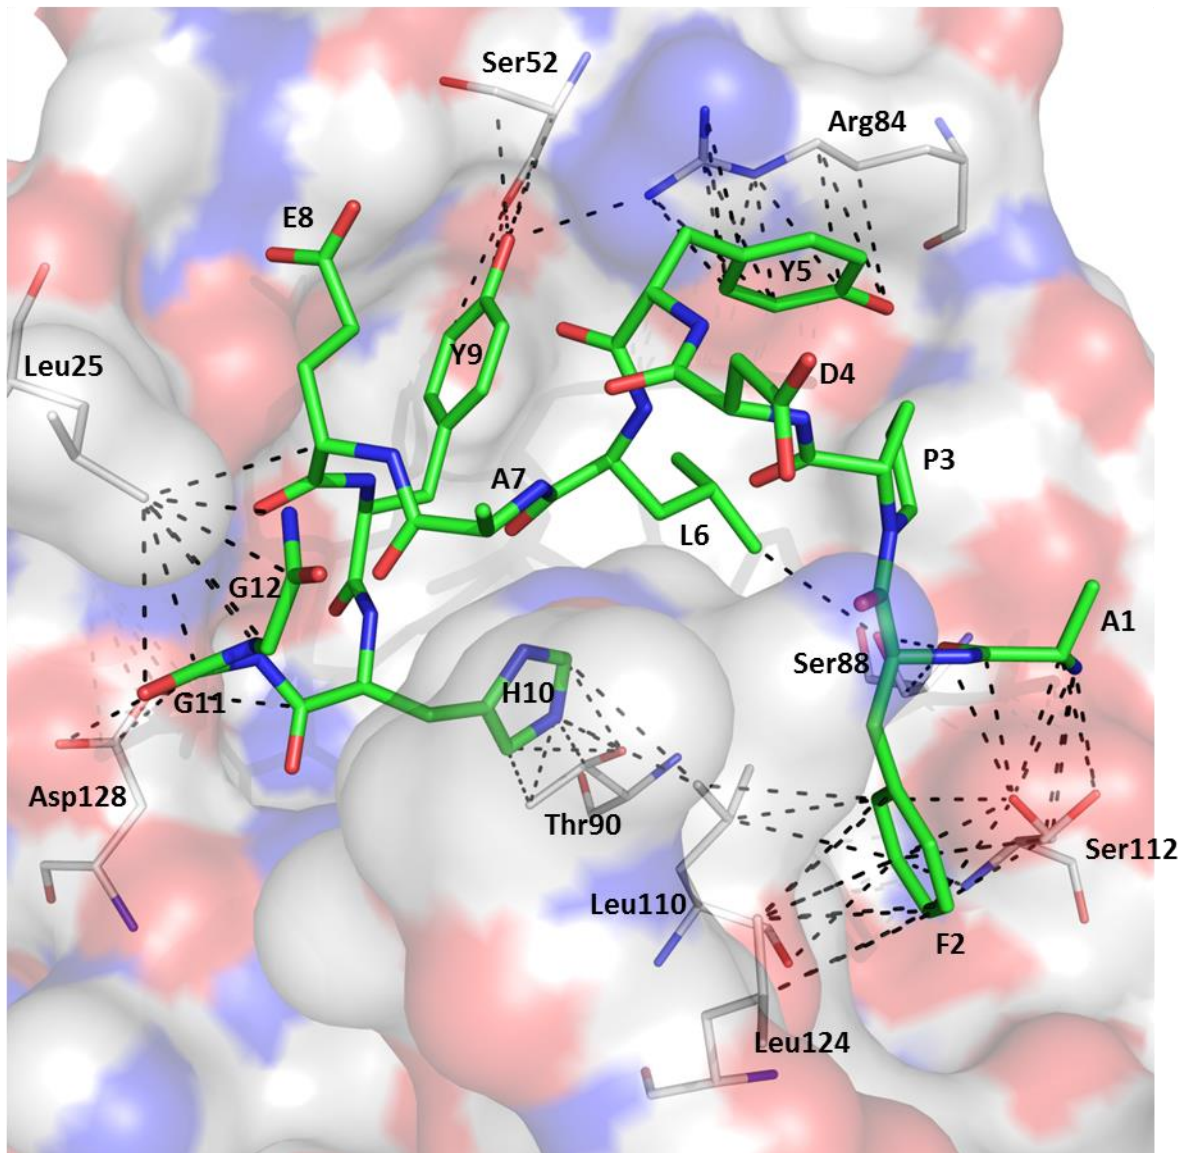

**Supplementary Figure 6.** Specificity plot and co-crystal structure with streptavidin for the RDPAPAWAHGGG L-peptide. (A) Substitution plot showing signal intensity for 20 amino acid substitutions and a deletion for each peptide position. The color coding scheme for the bars representing signal intensity is the same as in Figure 2. (B) The dashed lines show interactions between the peptide (green) and streptavidin (orange) key amino acids (sticks) at 4 Å distance. The biotin binding pocket of streptavidin is shown as a surface. The peptide amino acids are shown in the single-letter amino acid code and streptavidin ones in the three-letter amino acid code.

The backbone carbonyl oxygen of Pro3 of the RDPAPAWAHGGG peptide forms a hydrogen bond with Ser88, and Pro5 overlaps with the position of Pro5 of the EWVHPQFEQKAK peptide and allows hydrogen bonds to form between the highly specific His9 of the peptide and Thr90 of streptavidin. Another invariant residue, Trp7, contributes to the binding by forming a van der Waals interaction with the backbone of Glu44 and Ser45 of loop 3/4. The short hydrophobic sidechain of the highly specific Ala8 is structurally critical for an edge-to-face interaction with Trp79. The C-terminal region of the RDPAPAWAHGGG peptide extends to a neighboring streptavidin subunit for additional van der Waals contacts with Trp120.

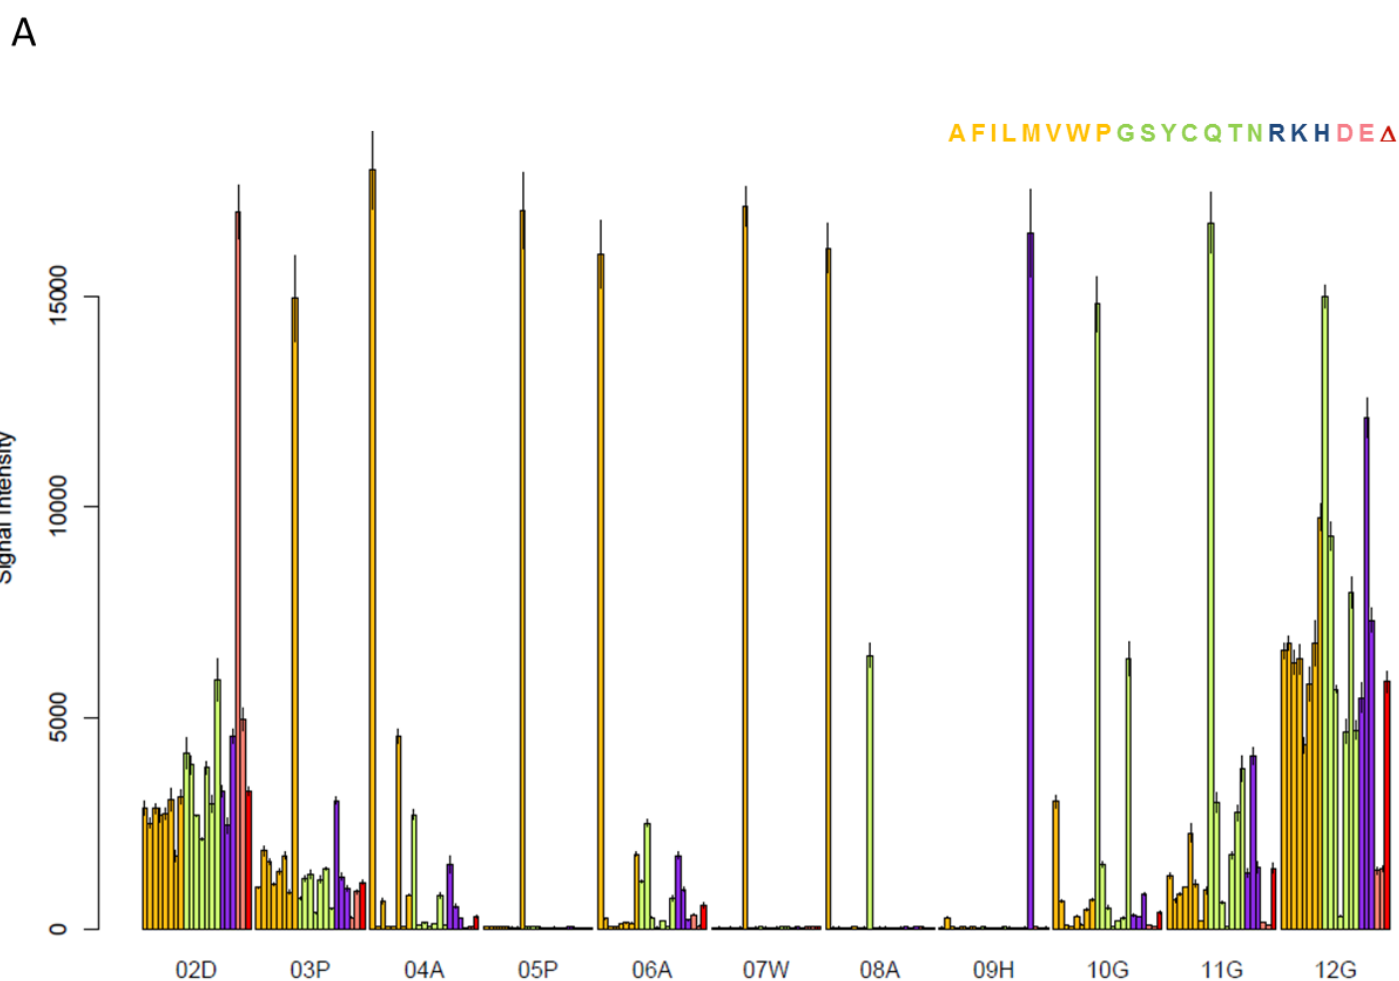

B

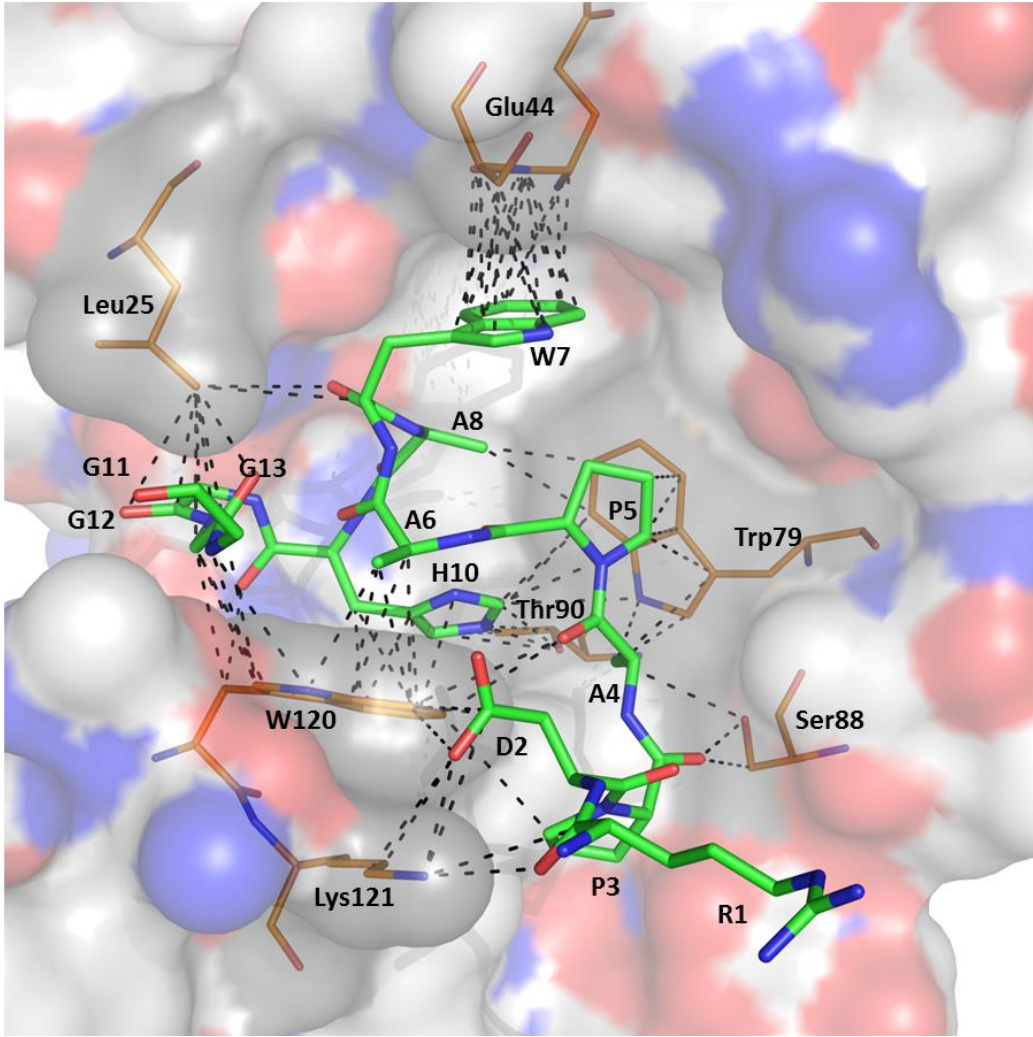

**Supplementary Figure 7.** Co-crystal structure and specificity plots with streptavidin for Gdlwqheatwkkq and GGwhdeatwkpG D-peptides. (A) The dashed lines show interactions between the GGwhdeatwkpG peptide (green) and streptavidin (grey) key amino acids (sticks) at 4 Å distance. The superimposed structure of the Gdlwqheatwkkq peptide is shown in yellow. Peptide amino acids are indicated by the single-letter amino acid code and streptavidin amino acids are indicated by the three-letter amino acid code. (B) Substitution plot for the “wheea” region of the d5e variant of the GGwhdeatwkpG peptide. (C) Substitution plot for the “wqhea” region of the Gdlwqheatwkkq peptide. The color coding scheme for the bars representing signal intensity is the same as in Figure 2.

A

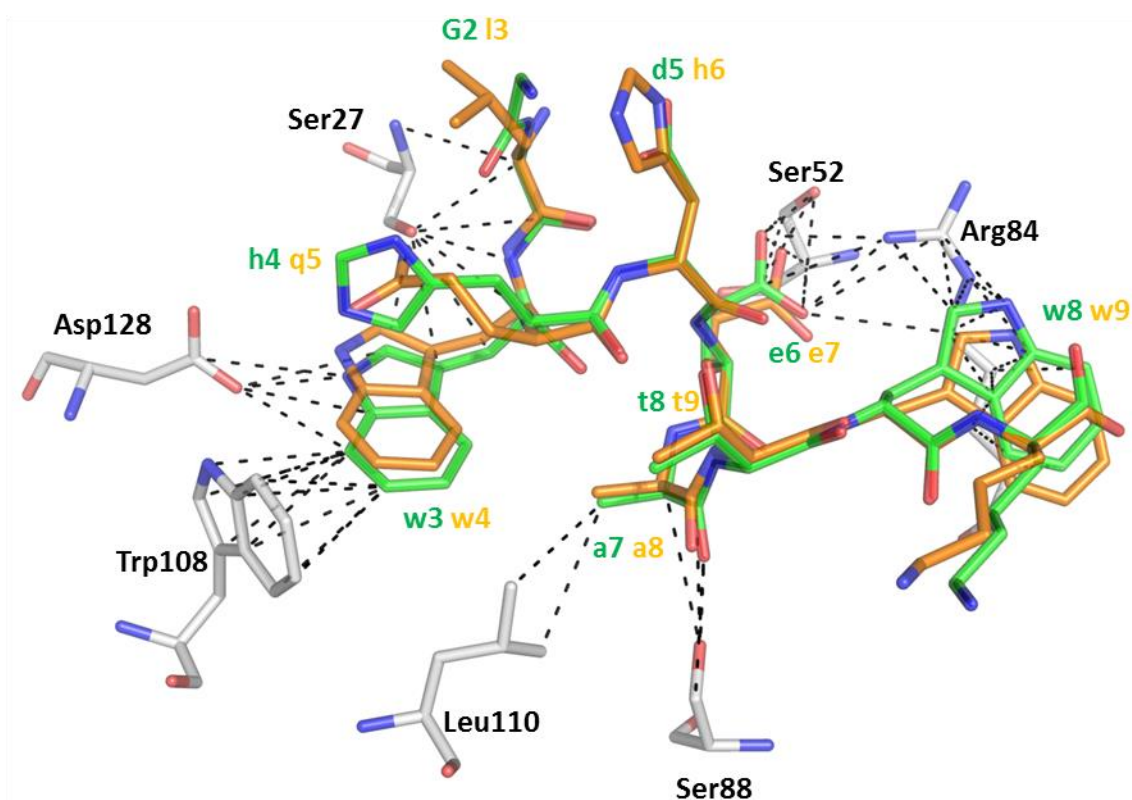

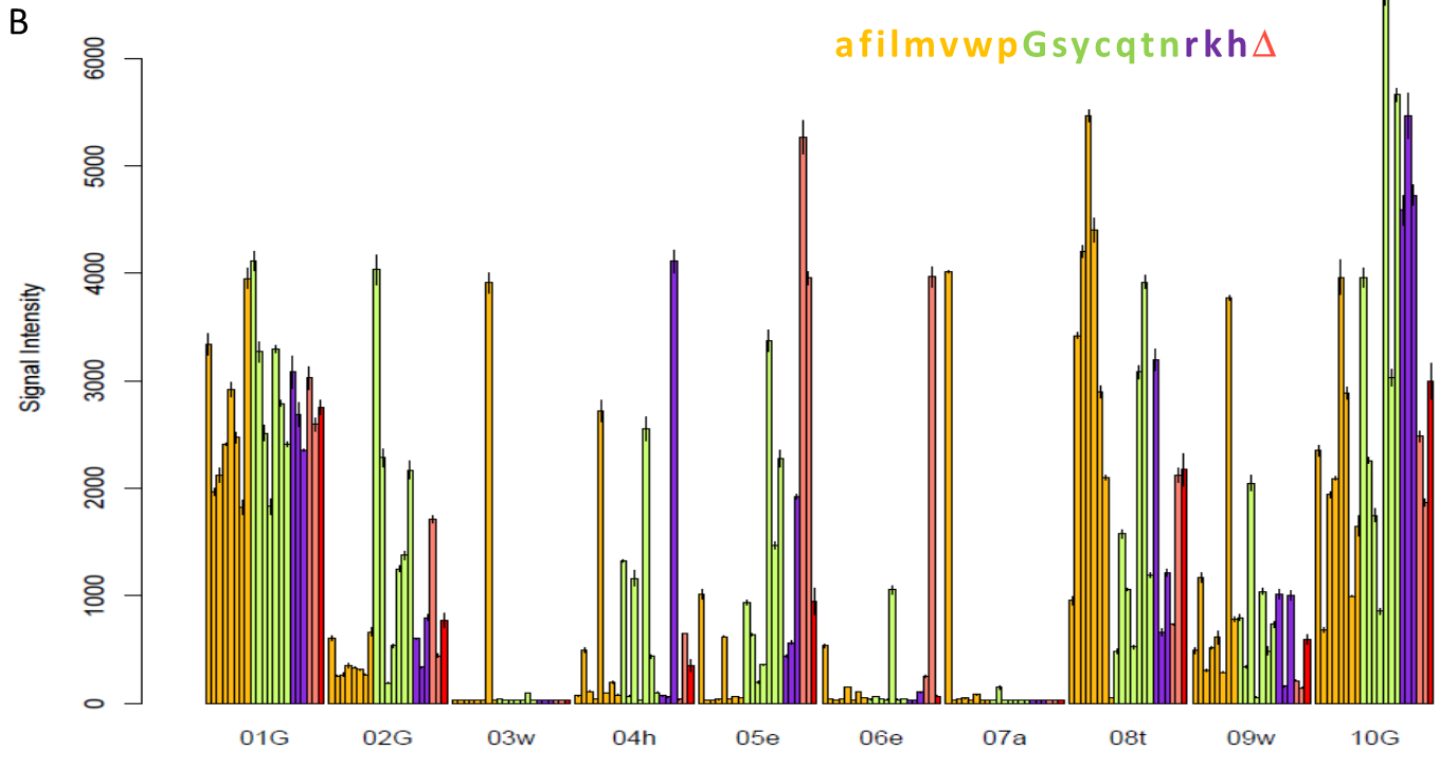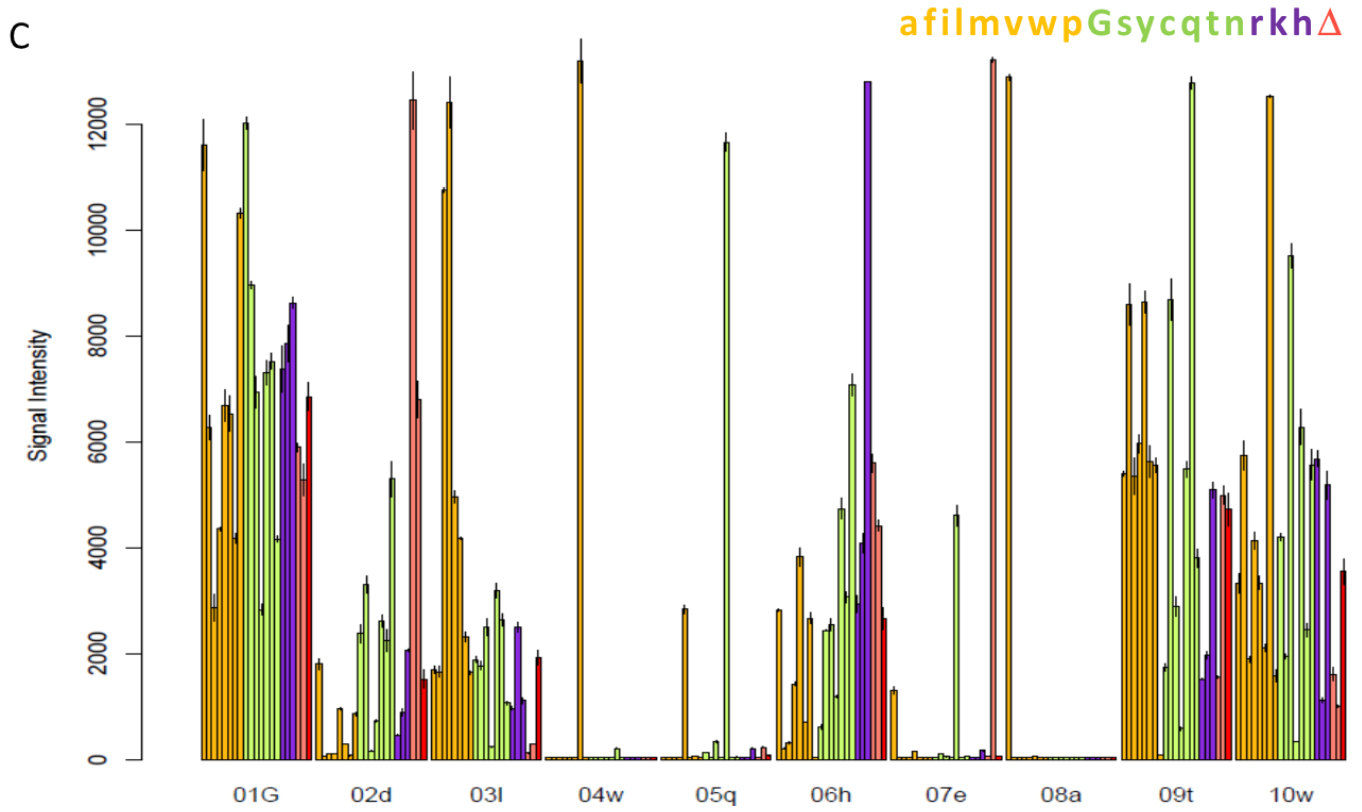

**Supplementary Figure 8.** Specificity plot and co-crystal structure with streptavidin for the GyGlanvdessG D-peptide. (A) Substitution plot showing signal intensity for 20 amino acid substitutions and a deletion for each peptide position. The color coding scheme for the bars representing signal intensity is the same as in Figure 2. (B) The dashed lines show interactions between the peptide (green) and streptavidin (orange) key amino acids (sticks) at 4 Å distance. The biotin binding pocket of streptavidin is shown as a surface. Peptide amino acids are indicated by the single-letter amino acid code and streptavidin amino acids are indicated by the single-letter amino acid code.

The short, aliphatic sidechain of D-Ala5 is needed to fit into a small pocket near Trp79. D-Asn6, which closely overlaps with the Gln of the HPQ motif in the EWVHPQFEQKAK structure, is also indispensable because it is involved in a network of interactions with Thr90, Trp108, Leu110, and Trp120 from a neighboring subunit. Further, the D-Asp8 sidechain has the optimal length to form charge-charge interactions with Arg84.

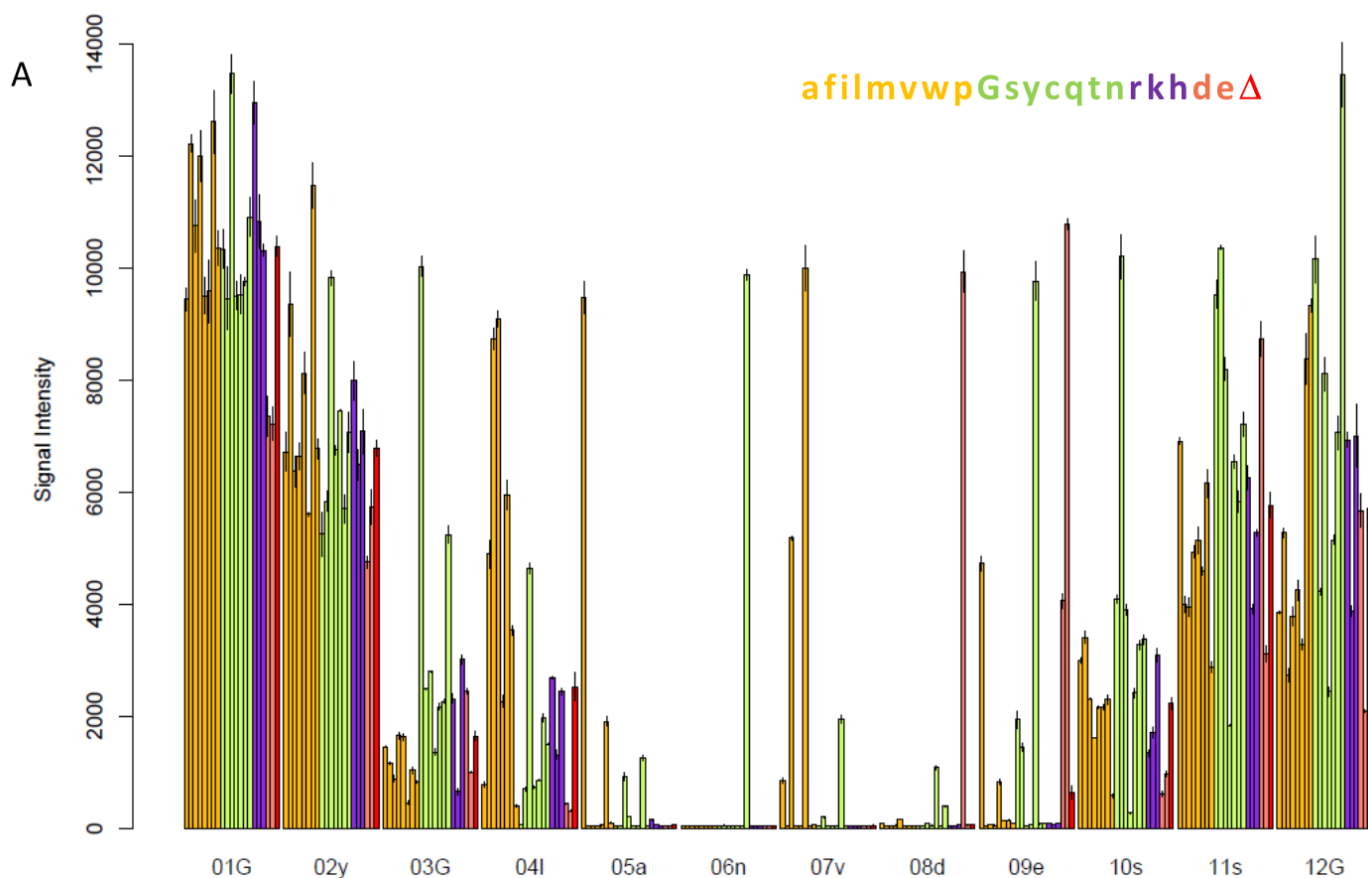



B

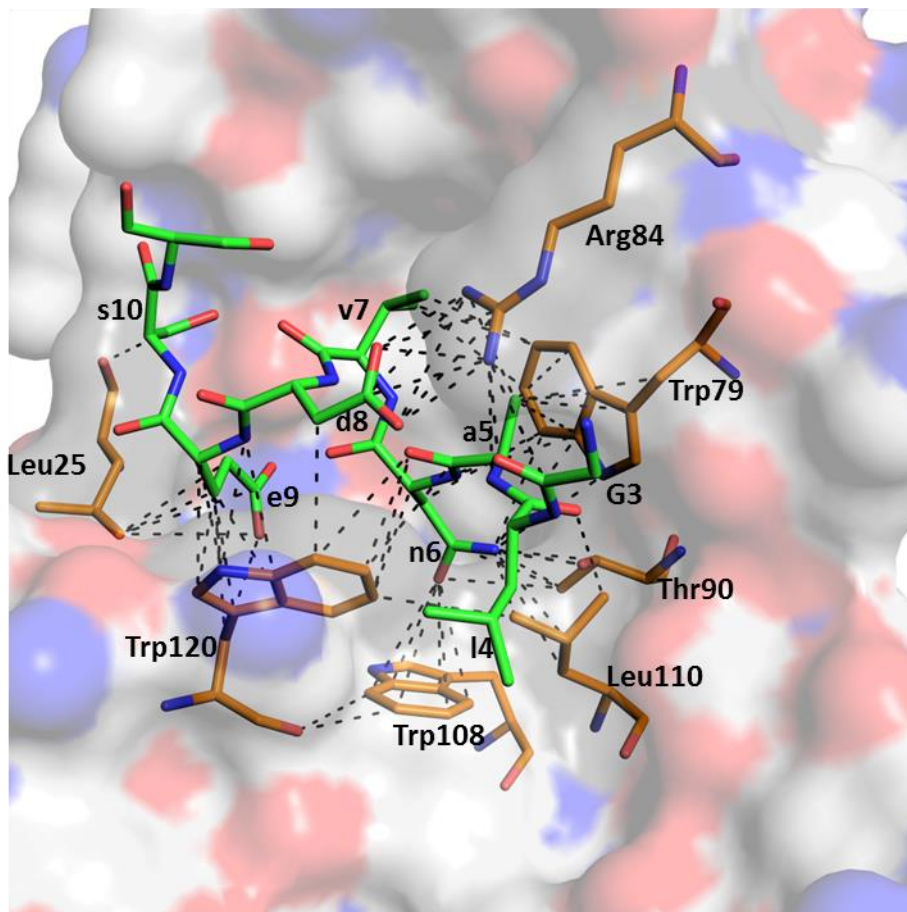

Supplement: 41598_2017_12440_MOESM1_ESM.pdf [file 41598_2017_12440_MOESM1_ESM.pdf]
